# Supplementary material for: The phospho–caveolin-1 scaffolding domain dampens force fluctuations in focal adhesions and promotes cancer cell migration
Source: PubMed Central journal article supplement — Mol Biol Cell. 2017 Aug 1;28(16):2190–201. doi: 10.1091/mbc.E17-05-0278 (PMC5531735; doi:10.1091/mbc.e17-05-0278), 2017-08-01
Supplement: supp_E17-05-0278v1_CombinedSupMats.pdf [file supp_E17-05-0278v1_CombinedSupMats.pdf]

# Supplemental Materials

*Molecular Biology of the Cell*

Meng et al.

**Supplementary Figure 1.** Confocal microscopy analysis of stably Cav1 transfected DU145 cell lines. Representative confocal images of DU145 and the stably transfected DU145 cells labeled with anti-FAK antibody and phalloidin to show the morphology, the distribution of the mRFP-tagged Cav1 constructs and the expression of focal adhesions.

**Supplementary Figure 2.** DU145 cells were transiently transfected with FAK-EGFP and the indicated Cav1-mRFP mutant constructs. Cells expressing similar intensity levels of mRFP were analyzed by FRAP for FAK-EGFP recovery after photobleaching in focal adhesions. Graphs show FAK-EGFP mobile fractions and average mRFP intensity of cells analyzed. (Data represent mean $\pm$ SEM of three independent experiments.  $n>10$  for each experiment for the FAK-EGFP mobile fraction graph and  $n>4$  for each experiment for the mRFP intensity graph. One-way ANOVA with Tukey post-test; \*\*\*,  $p<0.001$ .)

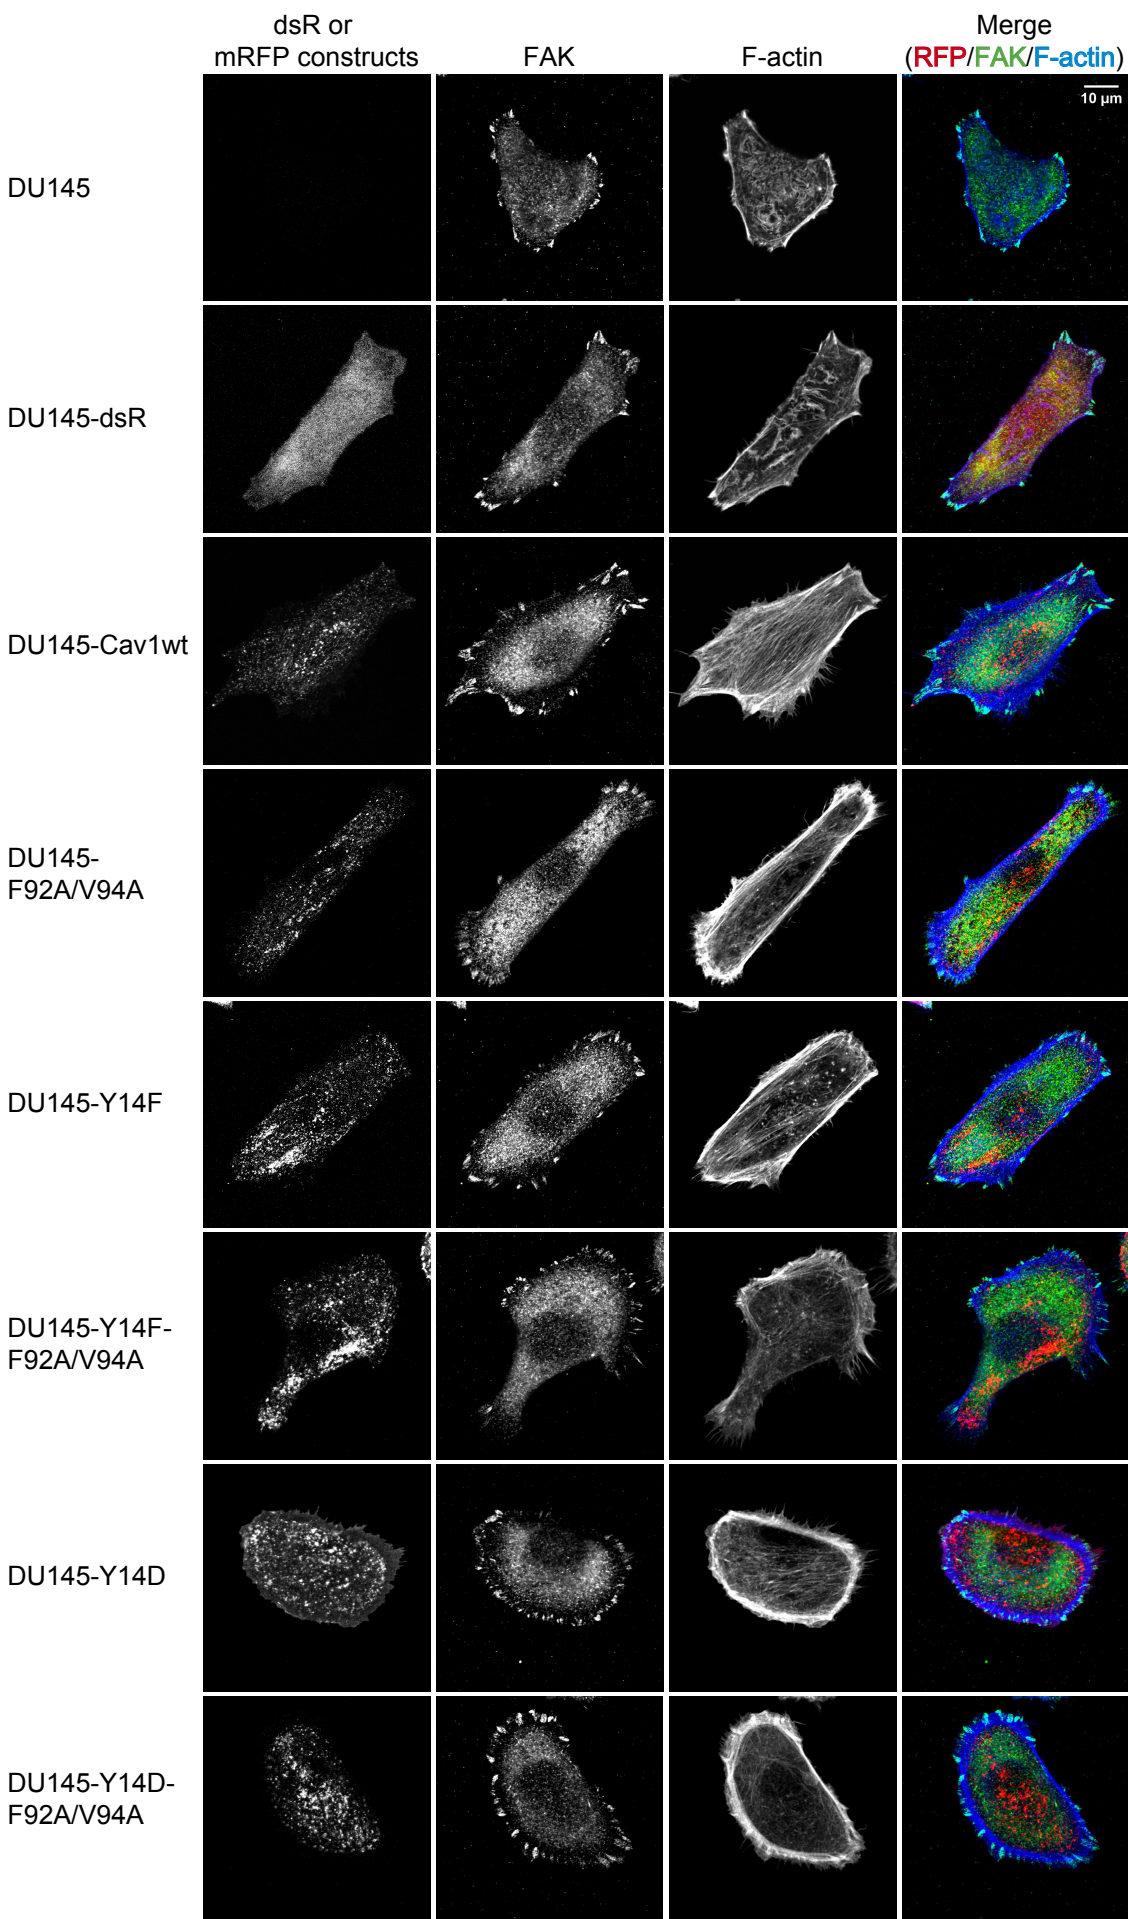

Sup 1

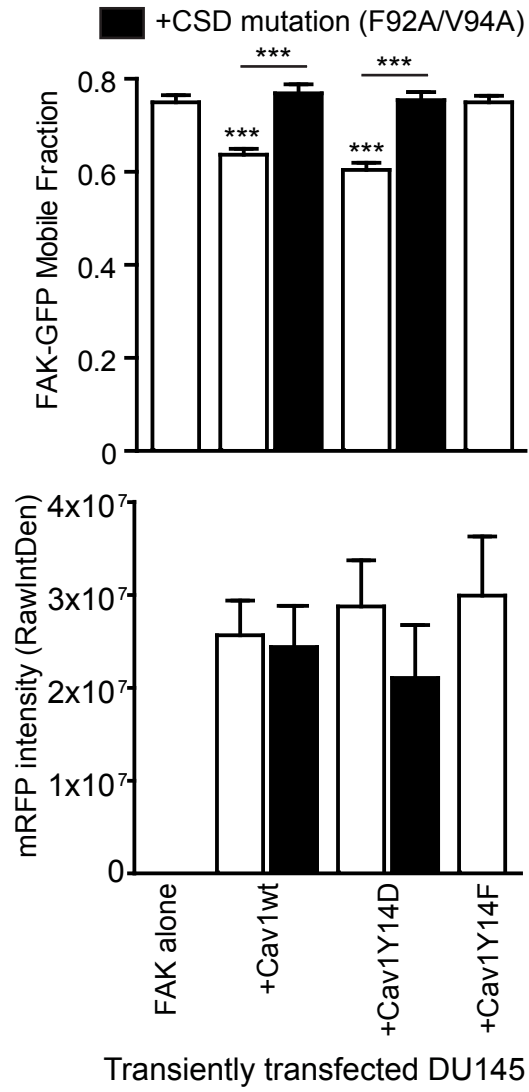

Sup 2
